# Supplementary material
Source: publisher figshare collection journal article supplement (https://gsajournals.figshare.com/ndownloader/files/21512187)
Supplement: Supplementary file 1 [file 21512187]

## Sheet: glh_mass_spec
Accession.Number	Identified.proteins	Molecular.Weight	FLAG..GLH.1.control..GFP..PRG.1..rep1	FLAG..GLH.1.rep1	FLAG..GLH.1.DAAD.rep1	FLAG..GLH.1.DQAD.rep1	DQAD.control.rep2	FLAG..GLH.1.rep2	FLAG..GLH.1.DAAD.rep2	FLAG..GLH.1.DQAD.rep2
GLH1_CAEEL	ATP-dependent RNA helicase glh-1 OS=Caenorhabditis elegans GN=glh-1 PE=1 SV=3	80 kDa	0	384	266	481	4	404	410	463
GLH2_CAEEL	ATP-dependent RNA helicase glh-2 OS=Caenorhabditis elegans GN=glh-2 PE=1 SV=1	100 kDa	0	153	102	196	0	166	175	201
VIT6_CAEEL	Vitellogenin-6 OS=Caenorhabditis elegans GN=vit-6 PE=1 SV=5	193 kDa	0	74	64	78	0	59	58	17
P00761.1	Trypsin precursor CONTAMINANT [Sus scrofa]	24 kDa	68	53	53	57	34	38	33	34
VIT2_CAEEL [2]	Cluster of Vitellogenin-2 OS=Caenorhabditis elegans GN=vit-2 PE=1 SV=5 (VIT2_CAEEL)	188 kDa	0	59	47	38	0	75	89	19
VIT2_CAEEL	Vitellogenin-2 OS=Caenorhabditis elegans GN=vit-2 PE=1 SV=5	188 kDa	0	58	45	37	0	71	77	19
O45865_CAEEL	Adenine Nucleotide Translocator OS=Caenorhabditis elegans GN=ant-1.1 PE=1 SV=1	33 kDa	1	54	45	34	0	9	7	1
O45865_CAEEL [3]	Cluster of Adenine Nucleotide Translocator OS=Caenorhabditis elegans GN=ant-1.1 PE=1 SV=1 (O45865_CAEEL)	33 kDa	1	54	45	34	0	9	7	1
VIT5_CAEEL [2]	Cluster of Vitellogenin-5 OS=Caenorhabditis elegans GN=vit-5 PE=2 SV=2 (VIT5_CAEEL)	186 kDa	0	49	36	34	0	0	0	0
VIT1_CAEEL	Vitellogenin-1 OS=Caenorhabditis elegans GN=vit-1 PE=1 SV=2	188 kDa	0	35	30	32	0	35	45	8
VIT5_CAEEL	Vitellogenin-5 OS=Caenorhabditis elegans GN=vit-5 PE=2 SV=2	186 kDa	0	45	33	31	0	24	36	9
WAGO1_CAEEL	Argonaute protein wago-1 OS=Caenorhabditis elegans GN=wago-1 PE=1 SV=1	105 kDa	0	0	0	30	0	0	0	14
VIT4_CAEEL	Vitellogenin-4 OS=Caenorhabditis elegans GN=vit-4 PE=1 SV=3	186 kDa	0	42	31	29	0	20	34	0
P90786_CAEEL	Piwi-like protein OS=Caenorhabditis elegans GN=prg-1 PE=1 SV=1	94 kDa	0	0	0	28	0	1	0	46
EF1A_CAEEL	Elongation factor 1-alpha OS=Caenorhabditis elegans GN=eft-3 PE=3 SV=1	51 kDa	1	51	27	25	0	27	32	14
O17921_CAEEL [3]	Cluster of Tubulin beta chain OS=Caenorhabditis elegans GN=tbb-1 PE=1 SV=1 (O17921_CAEEL)	50 kDa	0	37	29	21	0	11	10	2
TBA2_CAEEL [3]	Cluster of Tubulin alpha-2 chain OS=Caenorhabditis elegans GN=tba-2 PE=2 SV=1 (TBA2_CAEEL)	50 kDa	0	26	29	21	0	7	9	3
O17921_CAEEL	Tubulin beta chain OS=Caenorhabditis elegans GN=tbb-1 PE=1 SV=1	50 kDa	0	37	29	20	0	11	10	2
TBB2_CAEEL	Tubulin beta-2 chain OS=Caenorhabditis elegans GN=tbb-2 PE=3 SV=1	50 kDa	0	36	28	19	0	11	10	2
NP_006112.3	keratin, type II cytoskeletal 1 CONTAMINANT [Homo sapiens]	66 kDa	31	168	17	18	30	53	21	27
TBA2_CAEEL	Tubulin alpha-2 chain OS=Caenorhabditis elegans GN=tba-2 PE=2 SV=1	50 kDa	0	25	26	18	0	7	9	3
O62275_CAEEL	Piwi-like protein OS=Caenorhabditis elegans GN=wago-4 PE=1 SV=1	107 kDa	0	0	0	14	0	0	0	17
HSP90_CAEEL	Heat shock protein 90 OS=Caenorhabditis elegans GN=daf-21 PE=1 SV=1	80 kDa	1	21	16	13	0	12	10	0
HSP90_CAEEL [2]	Cluster of Heat shock protein 90 OS=Caenorhabditis elegans GN=daf-21 PE=1 SV=1 (HSP90_CAEEL)	80 kDa	1	22	16	13	0	0	0	0
Q18599_CAEEL	ACEtyl-CoA Regulator OS=Caenorhabditis elegans GN=acer-1 PE=1 SV=3	51 kDa	0	19	21	13	0	16	19	6
PYC1_CAEEL	Pyruvate carboxylase 1 OS=Caenorhabditis elegans GN=pyc-1 PE=1 SV=1	129 kDa	0	25	30	12	0	22	31	7
G5EDD4_CAEEL	Tubulin alpha chain OS=Caenorhabditis elegans GN=tba-4 PE=1 SV=1	50 kDa	0	13	15	11	0	6	8	0
Q9U302_CAEEL	Polyadenylate-binding protein OS=Caenorhabditis elegans GN=pab-1 PE=1 SV=1	72 kDa	0	0	0	11	0	0	0	19
H2KZG6_CAEEL	Acyl CoA DeHydrogenase OS=Caenorhabditis elegans GN=acdh-1 PE=1 SV=1	47 kDa	0	11	11	10	0	0	0	0
HSP7A_CAEEL	Heat shock 70 kDa protein A OS=Caenorhabditis elegans GN=hsp-1 PE=1 SV=2	70 kDa	0	13	14	9	0	9	14	1
HSP7A_CAEEL [2]	Cluster of Heat shock 70 kDa protein A OS=Caenorhabditis elegans GN=hsp-1 PE=1 SV=2 (HSP7A_CAEEL)	70 kDa	0	14	14	9	0	0	0	0
Q20206_CAEEL	Ribosomal Protein, Small subunit OS=Caenorhabditis elegans GN=rps-11 PE=1 SV=1	18 kDa	1	9	11	9	0	1	1	0
Q9N585_CAEEL	Piwi-like protein OS=Caenorhabditis elegans GN=ppw-2 PE=1 SV=1	108 kDa	0	0	0	9	0	0	0	7
IDH3B_CAEEL	Probable isocitrate dehydrogenase [NAD] subunit beta, mitochondrial OS=Caenorhabditis elegans GN=idhb-1 PE=3 SV=1	42 kDa	0	8	8	8	0	2	1	0
ATPB_CAEEL	ATP synthase subunit beta, mitochondrial OS=Caenorhabditis elegans GN=atp-2 PE=1 SV=2	58 kDa	0	7	12	7	0	3	2	0
G5ECM6_CAEEL	Elongation factor Tu homologue OS=Caenorhabditis elegans GN=tufm-1 PE=1 SV=1	55 kDa	0	3	4	6	0	4	4	1
G5ECU3_CAEEL (+1)	Uncharacterized protein OS=Caenorhabditis elegans GN=CELE_F01G4.6 PE=1 SV=1	42 kDa	0	8	12	6	0	7	6	1
NP_000412.3	keratin, type I cytoskeletal 10 CONTAMINANT [Homo sapiens]	59 kDa	11	114	16	6	11	27	14	18
NP_000412.3 [2]	Cluster of keratin, type I cytoskeletal 10 CONTAMINANT [Homo sapiens] (NP_000412.3)	59 kDa	11	120	16	6	11	27	14	18
Q9GZH5_CAEEL	Proteasome Regulatory Particle, Non-ATPase-like OS=Caenorhabditis elegans GN=rpn-1 PE=1 SV=1	107 kDa	0	2	1	6	0	2	1	0
E9P860_CAEEL (+1)	Uncharacterized protein OS=Caenorhabditis elegans GN=CELE_ZK1067.2 PE=1 SV=1	280 kDa	0	0	1	5	0	0	0	0
EF2_CAEEL	Elongation factor 2 OS=Caenorhabditis elegans GN=eef-2 PE=2 SV=4	95 kDa	0	8	6	5	0	12	14	7
H2KZD5_CAEEL (+1)	Chromosome-Segregation and RNAi deficient OS=Caenorhabditis elegans GN=csr-1 PE=1 SV=1	116 kDa	0	0	1	5	0	0	0	10
NP_000217.2	keratin, type I cytoskeletal 9 CONTAMINANT [Homo sapiens]	62 kDa	10	6	0	5	11	26	6	11
UCR1_CAEEL	Cytochrome b-c1 complex subunit 1, mitochondrial OS=Caenorhabditis elegans GN=ucr-1 PE=3 SV=2	52 kDa	0	5	7	5	0	2	3	0
IDH3A_CAEEL	Probable isocitrate dehydrogenase [NAD] subunit alpha, mitochondrial OS=Caenorhabditis elegans GN=idha-1 PE=3 SV=3	38 kDa	0	12	7	4	0	12	13	1
IF4A_CAEEL	Eukaryotic initiation factor 4A OS=Caenorhabditis elegans GN=inf-1 PE=2 SV=1	45 kDa	0	12	6	4	0	3	4	0
NP_000414.2	keratin, type II cytoskeletal 2 epidermal CONTAMINANT [Homo sapiens]	65 kDa	14	31	6	4	6	14	9	12
O45815_CAEEL	ACTin OS=Caenorhabditis elegans GN=act-5 PE=1 SV=1	42 kDa	0	20	19	4	0	4	3	0
Q18990_CAEEL	PYRimidine biosynthesis OS=Caenorhabditis elegans GN=pyr-1 PE=1 SV=2	243 kDa	0	3	6	4	0	5	13	0
Q19057_CAEEL	Acyl CoA DeHydrogenase OS=Caenorhabditis elegans GN=acdh-12 PE=1 SV=1	66 kDa	0	3	7	4	0	0	0	0
Q22620_CAEEL	Prolyl Amino-acyl tRNA Synthetase OS=Caenorhabditis elegans GN=pars-1 PE=1 SV=1	66 kDa	0	7	4	4	0	0	0	0
RL23_CAEEL	60S ribosomal protein L23 OS=Caenorhabditis elegans GN=rpl-23 PE=3 SV=1	15 kDa	0	8	5	4	0	2	3	0
TBA3_CAEEL	Tubulin alpha-3 chain OS=Caenorhabditis elegans GN=mec-12 PE=1 SV=1	50 kDa	0	0	5	4	0	0	0	0
RS14_CAEEL	40S ribosomal protein S14 OS=Caenorhabditis elegans GN=rps-14 PE=3 SV=1	16 kDa	0	7	4	3	0	4	5	0
SIP1_CAEEL	Stress-induced protein 1 OS=Caenorhabditis elegans GN=sip-1 PE=1 SV=1	18 kDa	0	9	2	3	0	13	11	8
SUCB1_CAEEL	Probable succinate--CoA ligase [ADP-forming] subunit beta, mitochondrial OS=Caenorhabditis elegans GN=suca-1 PE=3 SV=1	47 kDa	0	7	7	3	0	5	3	0
SYDC_CAEEL	Aspartate--tRNA ligase, cytoplasmic OS=Caenorhabditis elegans GN=drs-1 PE=3 SV=1	60 kDa	0	21	7	3	0	1	0	0
ATPA_CAEEL	ATP synthase subunit alpha, mitochondrial OS=Caenorhabditis elegans GN=H28O16.1 PE=1 SV=1	58 kDa	0	11	11	1	0	5	6	0
G5ECC3_CAEEL (+4)	Receptor Mediated Endocytosis OS=Caenorhabditis elegans GN=rme-1 PE=1 SV=1	94 kDa	0	5	2	1	0	0	0	0
RL10_CAEEL	60S ribosomal protein L10 OS=Caenorhabditis elegans GN=rpl-10 PE=3 SV=1	25 kDa	0	4	7	1	0	0	0	0
RL4_CAEEL	60S ribosomal protein L4 OS=Caenorhabditis elegans GN=rpl-4 PE=1 SV=3	39 kDa	0	10	6	1	0	6	8	2
ACT2_CAEEL (+1)	Actin-2 OS=Caenorhabditis elegans GN=act-2 PE=3 SV=3	42 kDa	0	12	10	0	0	0	0	0
ADH1_CAEEL	Alcohol dehydrogenase 1 OS=Caenorhabditis elegans GN=sodh-1 PE=2 SV=2	38 kDa	0	6	3	0	0	3	1	1
CLU_CAEEL	Clustered mitochondria protein homolog OS=Caenorhabditis elegans GN=clu-1 PE=3 SV=1	140 kDa	0	12	8	0	0	2	3	0
G5EFU2_CAEEL (+1)	Adenine Nucleotide Translocator OS=Caenorhabditis elegans GN=ant-1.4 PE=1 SV=1	34 kDa	0	0	0	0	0	7	4	0
GLH3_CAEEL	ATP-dependent RNA helicase glh-3 OS=Caenorhabditis elegans GN=glh-3 PE=1 SV=1	80 kDa	0	0	0	0	0	8	0	11
HSP7D_CAEEL	Heat shock 70 kDa protein D OS=Caenorhabditis elegans GN=hsp-4 PE=1 SV=2	72 kDa	0	4	0	0	0	0	3	0
O77727.1	Keratin, type I cytoskeletal 15 SHEEP CONTAMINANT [Ovis aries]	49 kDa	0	22	0	0	0	0	0	0
RL7_CAEEL	60S ribosomal protein L7 OS=Caenorhabditis elegans GN=rpl-7 PE=3 SV=1	28 kDa	0	5	0	0	0	1	1	0
14331_CAEEL	14-3-3-like protein 1 OS=Caenorhabditis elegans GN=par-5 PE=1 SV=2	28 kDa	0	0	0	0	0	1	2	0
14331_CAEEL [2]	Cluster of 14-3-3-like protein 1 OS=Caenorhabditis elegans GN=par-5 PE=1 SV=2 (14331_CAEEL)	28 kDa	0	0	0	0	0	1	2	0
14332_CAEEL	14-3-3-like protein 2 OS=Caenorhabditis elegans GN=ftt-2 PE=1 SV=1	28 kDa	0	0	0	0	0	1	1	0
3HIDH_CAEEL	Probable 3-hydroxyisobutyrate dehydrogenase, mitochondrial OS=Caenorhabditis elegans GN=B0250.5 PE=3 SV=1	31 kDa	0	0	0	0	0	0	2	1
A0A0K3AUJ9_CAEEL (+2)	PeRoxireDoXin OS=Caenorhabditis elegans GN=prdx-2 PE=1 SV=1	22 kDa	0	0	0	0	0	6	3	3
A0A0U1RML5_CAEEL (+1)	Piwi-like protein OS=Caenorhabditis elegans GN=sago-2 PE=1 SV=1	100 kDa	0	0	0	0	0	0	0	1
A8WI68_CAEEL (+2)	Calcium-transporting ATPase OS=Caenorhabditis elegans GN=sca-1 PE=1 SV=1	101 kDa	0	0	0	0	0	1	0	0
ACADM_CAEEL	Probable medium-chain specific acyl-CoA dehydrogenase 10, mitochondrial OS=Caenorhabditis elegans GN=acdh-10 PE=2 SV=1	45 kDa	0	0	0	0	0	2	8	2
ACADM_CAEEL [2]	Cluster of Probable medium-chain specific acyl-CoA dehydrogenase 10, mitochondrial OS=Caenorhabditis elegans GN=acdh-10 PE=2 SV=1 (ACADM_CAEEL)	45 kDa	0	0	0	0	0	2	8	2
ACT3_CAEEL	Actin-3 OS=Caenorhabditis elegans GN=act-3 PE=1 SV=1	42 kDa	0	0	0	0	0	6	1	0
ACT3_CAEEL [2]	Cluster of Actin-3 OS=Caenorhabditis elegans GN=act-3 PE=1 SV=1 (ACT3_CAEEL)	42 kDa	0	0	0	0	0	9	3	0
ALH13_CAEEL	Probable delta-1-pyrroline-5-carboxylate synthase OS=Caenorhabditis elegans GN=alh-13 PE=3 SV=2	87 kDa	0	0	0	0	0	1	2	0
B3CJ34_CAEEL	GCN (Yeast General Control Nondrepressible) homolog OS=Caenorhabditis elegans GN=gcn-1 PE=1 SV=2	292 kDa	0	0	0	0	0	2	2	0
B3WFW9_CAEEL (+1)	Uncharacterized protein OS=Caenorhabditis elegans GN=C41G7.9 PE=1 SV=1	19 kDa	0	0	0	0	0	1	1	0
CGH1_CAEEL	ATP-dependent RNA helicase cgh-1 OS=Caenorhabditis elegans GN=cgh-1 PE=1 SV=1	49 kDa	0	0	0	0	0	3	2	3
CH60_CAEEL	Chaperonin homolog Hsp-60, mitochondrial OS=Caenorhabditis elegans GN=hsp-60 PE=2 SV=2	60 kDa	0	0	0	0	0	0	1	0
CLH_CAEEL	Probable clathrin heavy chain 1 OS=Caenorhabditis elegans GN=chc-1 PE=3 SV=1	192 kDa	0	0	0	0	0	3	1	0
DI3L2_CAEEL	DIS3-like exonuclease 2 OS=Caenorhabditis elegans GN=F48E8.6 PE=3 SV=2	97 kDa	0	0	0	0	0	0	0	1
DIM_CAEEL	Disorganized muscle protein 1 OS=Caenorhabditis elegans GN=dim-1 PE=1 SV=3	72 kDa	0	0	0	0	0	1	1	0
DYN1_CAEEL	Dynamin OS=Caenorhabditis elegans GN=dyn-1 PE=1 SV=3	93 kDa	0	0	0	0	0	1	1	0
E9P860_CAEEL	Uncharacterized protein OS=Caenorhabditis elegans GN=CELE_ZK1067.2 PE=1 SV=1	280 kDa	0	0	0	0	0	0	0	1
EF1A_CAEEL [2]	Cluster of Elongation factor 1-alpha OS=Caenorhabditis elegans GN=eft-3 PE=3 SV=1 (EF1A_CAEEL)	51 kDa	0	0	0	0	0	27	32	14
ENO_CAEEL	Enolase OS=Caenorhabditis elegans GN=enol-1 PE=1 SV=3	47 kDa	0	0	0	0	0	0	3	0
G1K0V8_CAEEL	Eukaryotic translation initiation factor 5A OS=Caenorhabditis elegans GN=iff-1 PE=1 SV=1	18 kDa	0	0	0	0	0	0	1	0
G3MU88_CAEEL (+1)	Yeast SEC homolog OS=Caenorhabditis elegans GN=sec-61 PE=1 SV=1	49 kDa	0	0	0	0	0	0	1	0
G5EBY3_CAEEL	Non-muscle MYosin OS=Caenorhabditis elegans GN=nmy-2 PE=1 SV=1	231 kDa	0	0	0	0	0	2	0	0
G5EC69_CAEEL (+3)	Protein-tyrosine-phosphatase OS=Caenorhabditis elegans GN=CELE_T13H5.1 PE=1 SV=1	101 kDa	0	0	0	0	4	0	0	0
G5ECC3_CAEEL (+1)	Receptor Mediated Endocytosis OS=Caenorhabditis elegans GN=rme-1 PE=1 SV=1	94 kDa	0	0	0	0	0	1	1	0
G5ECR7_CAEEL	ELongin B OS=Caenorhabditis elegans GN=elb-1 PE=1 SV=1	13 kDa	0	0	0	0	0	0	0	1
G5EDU3_CAEEL	PhosphoLipase D OS=Caenorhabditis elegans GN=pld-1 PE=1 SV=1	164 kDa	0	0	0	0	1	0	0	0
G5EDY8_CAEEL (+1)	Dynamin-Related Protein OS=Caenorhabditis elegans GN=drp-1 PE=1 SV=1	79 kDa	0	0	0	0	0	1	1	0
G5EEH6_CAEEL	IsoValeryl-CoA Dehydrogenase OS=Caenorhabditis elegans GN=ivd-1 PE=1 SV=1	46 kDa	0	0	0	0	0	0	1	0
G5EEK4_CAEEL	Uncharacterized protein OS=Caenorhabditis elegans GN=CELE_Y45F3A.1 PE=1 SV=1	38 kDa	0	0	0	0	1	0	0	0
G5EFG4_CAEEL	ABC transporter, class F OS=Caenorhabditis elegans GN=abcf-2 PE=1 SV=1	70 kDa	0	0	0	0	0	4	5	0
G8JY07_CAEEL (+1)	Protein Disulfide Isomerase OS=Caenorhabditis elegans GN=pdi-2 PE=1 SV=1	49 kDa	0	0	0	0	0	1	0	0
GBLP_CAEEL	Guanine nucleotide-binding protein subunit beta-2-like 1 OS=Caenorhabditis elegans GN=rack-1 PE=1 SV=3	36 kDa	0	0	0	0	0	6	5	0
GCP_CAEEL	Bifunctional glyoxylate cycle protein OS=Caenorhabditis elegans GN=icl-1 PE=1 SV=2	109 kDa	0	0	0	0	0	1	1	0
GLH4_CAEEL	ATP-dependent RNA helicase glh-4 OS=Caenorhabditis elegans GN=glh-4 PE=1 SV=2	121 kDa	0	0	0	0	0	0	0	4
GYS_CAEEL	Glycogen [starch] synthase OS=Caenorhabditis elegans GN=gsy-1 PE=1 SV=1	76 kDa	0	0	0	0	0	1	0	0
H2KYV9_CAEEL (+1)	Piwi-like protein OS=Caenorhabditis elegans GN=ppw-1 PE=1 SV=1	103 kDa	0	0	0	0	0	0	0	1
H2KYV9_CAEEL [4]	Cluster of Piwi-like protein OS=Caenorhabditis elegans GN=ppw-1 PE=1 SV=1 (H2KYV9_CAEEL)	103 kDa	0	0	0	0	0	0	0	1
H2L0I8_CAEEL (+1)	Uncharacterized protein OS=Caenorhabditis elegans GN=CELE_T04C4.1 PE=1 SV=1	106 kDa	0	0	0	0	1	0	0	0
HSP7A_CAEEL [3]	Cluster of Heat shock 70 kDa protein A OS=Caenorhabditis elegans GN=hsp-1 PE=1 SV=2 (HSP7A_CAEEL)	70 kDa	0	0	0	0	0	9	14	1
HSP7C_CAEEL	Heat shock 70 kDa protein C OS=Caenorhabditis elegans GN=hsp-3 PE=3 SV=2	73 kDa	0	0	0	0	0	0	3	0
HSP7F_CAEEL	Heat shock 70 kDa protein F, mitochondrial OS=Caenorhabditis elegans GN=hsp-6 PE=1 SV=2	71 kDa	0	0	0	0	0	1	1	0
IMA2_CAEEL	Importin subunit alpha-2 OS=Caenorhabditis elegans GN=ima-2 PE=1 SV=1	59 kDa	0	0	0	0	0	2	0	0
IMA3_CAEEL	Importin subunit alpha-3 OS=Caenorhabditis elegans GN=ima-3 PE=1 SV=2	56 kDa	0	0	0	0	0	1	1	0
O01869_CAEEL	Ribosomal Protein, Small subunit OS=Caenorhabditis elegans GN=rps-10 PE=1 SV=1	17 kDa	0	0	0	0	0	1	1	0
O16266_CAEEL	Uncharacterized protein OS=Caenorhabditis elegans GN=CELE_F40A3.6 PE=1 SV=1	30 kDa	0	0	0	0	16	0	0	0
O16623_CAEEL	Uncharacterized protein OS=Caenorhabditis elegans GN=CELE_F36H9.1 PE=4 SV=5	31 kDa	0	0	0	0	2	0	0	0
O17218_CAEEL	Ribosomal Protein, Small subunit OS=Caenorhabditis elegans GN=rps-22 PE=1 SV=1	15 kDa	0	0	0	0	0	3	3	0
O18240_CAEEL	Ribosomal Protein, Small subunit OS=Caenorhabditis elegans GN=rps-18 PE=1 SV=1	18 kDa	0	0	0	0	0	4	4	1
O61763_CAEEL	Uncharacterized protein OS=Caenorhabditis elegans GN=CELE_ZK380.4 PE=4 SV=1	28 kDa	0	0	0	0	14	0	0	0
O76371_CAEEL	Proteasome Regulatory Particle, ATPase-like OS=Caenorhabditis elegans GN=rpt-5 PE=1 SV=1	48 kDa	0	0	0	0	0	2	2	0
ODB2_CAEEL	Lipoamide acyltransferase component of branched-chain alpha-keto acid dehydrogenase complex, mitochondrial OS=Caenorhabditis elegans GN=ZK669.4 PE=3 SV=1	50 kDa	0	0	0	0	0	0	2	0
P91306_CAEEL	C. Elegans Y-box OS=Caenorhabditis elegans GN=cey-2 PE=1 SV=1	29 kDa	0	0	0	0	0	0	0	3
P91398_CAEEL	C. Elegans Y-box OS=Caenorhabditis elegans GN=cey-3 PE=1 SV=1	29 kDa	0	0	0	0	0	0	0	2
PROF1_CAEEL	Profilin-1 OS=Caenorhabditis elegans GN=pfn-1 PE=2 SV=1	14 kDa	0	0	0	0	0	1	0	0
PRS10_CAEEL	Probable 26S protease regulatory subunit 10B OS=Caenorhabditis elegans GN=rpt-4 PE=1 SV=2	46 kDa	0	0	0	0	0	2	3	0
PRS4_CAEEL	Probable 26S protease regulatory subunit 4 OS=Caenorhabditis elegans GN=rpt-2 PE=3 SV=1	50 kDa	0	0	0	0	0	0	1	0
PRS7_CAEEL	26S protease regulatory subunit 7 OS=Caenorhabditis elegans GN=rpt-1 PE=1 SV=1	49 kDa	0	0	0	0	0	1	2	0
PSMD1_CAEEL	26S proteasome non-ATPase regulatory subunit 1 OS=Caenorhabditis elegans GN=rpn-2 PE=3 SV=4	106 kDa	0	0	0	0	0	1	1	0
PSMD3_CAEEL	26S proteasome non-ATPase regulatory subunit 3 OS=Caenorhabditis elegans GN=rpn-3 PE=1 SV=1	58 kDa	0	0	0	0	0	0	1	0
PSMD6_CAEEL	26S proteasome non-ATPase regulatory subunit 6 OS=Caenorhabditis elegans GN=rpn-7 PE=2 SV=1	48 kDa	0	0	0	0	0	0	1	0
Q09486_CAEEL	Uncharacterized protein OS=Caenorhabditis elegans GN=C30G12.2 PE=1 SV=2	29 kDa	0	0	0	0	0	0	1	0
Q09657_CAEEL	Uncharacterized protein OS=Caenorhabditis elegans GN=CELE_ZK1320.9 PE=1 SV=1	51 kDa	0	0	0	0	0	0	1	0
Q17489_CAEEL	Uncharacterized protein OS=Caenorhabditis elegans GN=unc-44 PE=1 SV=2	34 kDa	0	0	0	0	0	4	2	0
Q17489_CAEEL [2]	Cluster of Uncharacterized protein OS=Caenorhabditis elegans GN=unc-44 PE=1 SV=2 (Q17489_CAEEL)	34 kDa	0	0	0	0	0	4	2	0
Q18817_CAEEL	Tubulin beta chain OS=Caenorhabditis elegans GN=ben-1 PE=1 SV=3	49 kDa	0	0	0	0	0	5	6	1
Q18853_CAEEL	CYtochrome C OS=Caenorhabditis elegans GN=cyc-1 PE=1 SV=1	31 kDa	0	0	0	0	0	1	1	0
Q19130_CAEEL (+1)	Glutamine-Fructose 6-phosphate AminoTransferase homolog OS=Caenorhabditis elegans GN=gfat-1 PE=1 SV=1	81 kDa	0	0	0	0	0	5	6	0
Q19130_CAEEL [3]	Cluster of Glutamine-Fructose 6-phosphate AminoTransferase homolog OS=Caenorhabditis elegans GN=gfat-1 PE=1 SV=1 (Q19130_CAEEL)	81 kDa	0	0	0	0	0	5	6	0
Q19699_CAEEL	Glutamine-Fructose 6-phosphate AminoTransferase homolog OS=Caenorhabditis elegans GN=gfat-2 PE=1 SV=1	79 kDa	0	0	0	0	0	3	4	0
Q1XFY9_CAEEL	Ribosomal Protein, Small subunit OS=Caenorhabditis elegans GN=rps-24 PE=1 SV=1	15 kDa	0	0	0	0	0	0	1	0
Q20049_CAEEL	Isocitrate dehydrogenase [NAD] subunit, mitochondrial OS=Caenorhabditis elegans GN=idhg-1 PE=1 SV=2	44 kDa	0	0	0	0	0	5	1	0
Q20476_CAEEL	Uncharacterized protein OS=Caenorhabditis elegans GN=CELE_F46G10.1 PE=1 SV=3	20 kDa	0	0	0	0	19	0	0	0
Q21303_CAEEL	MecKel-Gruber Syndrome (MKS) homolog OS=Caenorhabditis elegans GN=mks-6 PE=4 SV=1	138 kDa	0	0	0	0	7	0	0	0
Q21322_CAEEL	RNP (RRM RNA binding domain) containing OS=Caenorhabditis elegans GN=rnp-2 PE=1 SV=2	23 kDa	0	0	0	0	0	0	0	3
Q21481_CAEEL	DeHydrogenases, Short chain OS=Caenorhabditis elegans GN=dhs-28 PE=1 SV=1	46 kDa	0	0	0	0	0	1	0	0
Q21793_CAEEL	Prion-like-(Q/N-rich)-domain-bearing protein OS=Caenorhabditis elegans GN=pqn-53 PE=1 SV=2	41 kDa	0	0	0	0	0	4	3	9
Q22781_CAEEL	Acyl CoA DeHydrogenase OS=Caenorhabditis elegans GN=acdh-7 PE=1 SV=2	45 kDa	0	0	0	0	0	2	6	2
Q23089_CAEEL	EXPOrtin (Nuclear export receptor) OS=Caenorhabditis elegans GN=xpo-1 PE=1 SV=2	124 kDa	0	0	0	0	0	1	1	0
Q23195_CAEEL	Uncharacterized protein OS=Caenorhabditis elegans GN=CELE_W06B4.2 PE=1 SV=1	58 kDa	0	0	0	0	17	0	0	0
Q7YTM5_CAEEL	Uncharacterized protein OS=Caenorhabditis elegans GN=CELE_F36H1.12 PE=4 SV=1	13 kDa	0	0	0	0	1	0	0	0
Q86NF3_CAEEL	Eukaryotic translation Elongation Factor OS=Caenorhabditis elegans GN=eef-1a.2 PE=1 SV=1	30 kDa	0	0	0	0	0	0	0	3
Q94046_CAEEL (+1)	PIS (Pax-2, IA-1/6, Smad-2 interacting protein) homolog OS=Caenorhabditis elegans GN=pis-1 PE=1 SV=1	120 kDa	0	0	0	0	1	0	0	0
Q95XJ0_CAEEL	Uncharacterized protein OS=Caenorhabditis elegans GN=CELE_Y69A2AR.18 PE=1 SV=1	32 kDa	0	0	0	0	0	1	1	0
Q966I7_CAEEL	Uncharacterized protein OS=Caenorhabditis elegans GN=CELE_K08D12.3 PE=1 SV=1	16 kDa	0	0	0	0	0	1	0	2
Q9N303_CAEEL	Uncharacterized protein OS=Caenorhabditis elegans GN=deps-1 PE=1 SV=1	69 kDa	0	0	0	0	0	0	0	4
Q9N5V3_CAEEL	IMportin Beta family OS=Caenorhabditis elegans GN=imb-3 PE=1 SV=2	122 kDa	0	0	0	0	0	3	4	0
Q9NEM5_CAEEL	Uncharacterized protein OS=Caenorhabditis elegans GN=CELE_Y111B2A.3 PE=1 SV=1	83 kDa	0	0	0	0	0	0	0	1
Q9TZK4_CAEEL	Uncharacterized protein OS=Caenorhabditis elegans GN=CELE_F40H3.3 PE=4 SV=1	15 kDa	0	0	0	0	2	0	0	0
Q9U1X9_CAEEL	Ribosomal protein, Large subunit, Acidic (P1) OS=Caenorhabditis elegans GN=rla-2 PE=1 SV=1	11 kDa	0	0	0	0	0	1	1	0
Q9XTT9_CAEEL	Proteasome Regulatory Particle, ATPase-like OS=Caenorhabditis elegans GN=rpt-6 PE=1 SV=1	46 kDa	0	0	0	0	0	2	1	0
Q9XVE9_CAEEL	Ribosomal Protein, Large subunit OS=Caenorhabditis elegans GN=rpl-14 PE=1 SV=1	15 kDa	0	0	0	0	0	3	2	0
Q9XVZ6_CAEEL	Uncharacterized protein OS=Caenorhabditis elegans GN=CELE_Y54G11A.3 PE=1 SV=1	57 kDa	0	0	0	0	0	2	1	1
Q9XW17_CAEEL	Cytokinesis, Apoptosis, RNA-associated OS=Caenorhabditis elegans GN=car-1 PE=1 SV=1	38 kDa	0	0	0	0	0	0	0	4
Q9XWS4_CAEEL	Ribosomal Protein, Large subunit OS=Caenorhabditis elegans GN=rpl-30 PE=1 SV=2	12 kDa	0	0	0	0	0	1	0	0
Q9XXN2_CAEEL	MICOS complex subunit MIC60 OS=Caenorhabditis elegans GN=immt-2 PE=1 SV=2	73 kDa	0	0	0	0	2	0	0	0
R23A1_CAEEL	60S ribosomal protein L23a 1 OS=Caenorhabditis elegans GN=rpl-25.1 PE=3 SV=1	17 kDa	0	0	0	0	0	0	1	0
R23A2_CAEEL	60S ribosomal protein L23a 2 OS=Caenorhabditis elegans GN=rpl-25.2 PE=3 SV=1	16 kDa	0	0	0	0	0	2	0	0
RAD50_CAEEL	DNA repair protein rad-50 OS=Caenorhabditis elegans GN=rad-50 PE=2 SV=1	150 kDa	0	0	0	0	4	0	0	0
RL10A_CAEEL	60S ribosomal protein L10a OS=Caenorhabditis elegans GN=rpl-10a PE=3 SV=1	24 kDa	0	0	0	0	0	1	2	0
RL12_CAEEL	60S ribosomal protein L12 OS=Caenorhabditis elegans GN=rpl-12 PE=3 SV=1	18 kDa	0	0	0	0	0	3	2	1
RL13_CAEEL	60S ribosomal protein L13 OS=Caenorhabditis elegans GN=rpl-13 PE=3 SV=1	24 kDa	0	0	0	0	0	0	1	0
RL15_CAEEL	60S ribosomal protein L15 OS=Caenorhabditis elegans GN=rpl-15 PE=3 SV=1	24 kDa	0	0	0	0	0	1	2	1
RL17_CAEEL	60S ribosomal protein L17 OS=Caenorhabditis elegans GN=rpl-17 PE=3 SV=1	22 kDa	0	0	0	0	0	1	1	0
RL18_CAEEL	60S ribosomal protein L18 OS=Caenorhabditis elegans GN=rpl-18 PE=3 SV=1	21 kDa	0	0	0	0	0	3	4	0
RL18A_CAEEL	60S ribosomal protein L18a OS=Caenorhabditis elegans GN=rpl-20 PE=3 SV=2	21 kDa	0	0	0	0	0	1	2	2
RL19_CAEEL	60S ribosomal protein L19 OS=Caenorhabditis elegans GN=rpl-19 PE=3 SV=1	24 kDa	0	0	0	0	0	2	2	1
RL22_CAEEL	60S ribosomal protein L22 OS=Caenorhabditis elegans GN=rpl-22 PE=1 SV=3	15 kDa	0	0	0	0	0	0	2	0
RL24_CAEEL	60S ribosomal protein L24 OS=Caenorhabditis elegans GN=rpl-24.1 PE=3 SV=1	18 kDa	0	0	0	0	0	1	0	0
RL27_CAEEL	60S ribosomal protein L27 OS=Caenorhabditis elegans GN=rpl-27 PE=2 SV=1	16 kDa	0	0	0	0	0	0	1	1
RL3_CAEEL	60S ribosomal protein L3 OS=Caenorhabditis elegans GN=rpl-3 PE=2 SV=1	46 kDa	0	0	0	0	0	3	6	0
RL36_CAEEL	60S ribosomal protein L36 OS=Caenorhabditis elegans GN=rpl-36 PE=1 SV=3	12 kDa	0	0	0	0	0	1	1	0
RL5_CAEEL	60S ribosomal protein L5 OS=Caenorhabditis elegans GN=rpl-5 PE=3 SV=1	33 kDa	0	0	0	0	0	4	5	2
RL6_CAEEL	60S ribosomal protein L6 OS=Caenorhabditis elegans GN=rpl-6 PE=1 SV=1	24 kDa	0	0	0	0	0	2	5	2
RL7A_CAEEL	60S ribosomal protein L7a OS=Caenorhabditis elegans GN=rpl-7A PE=1 SV=3	30 kDa	0	0	0	0	0	1	2	1
RL8_CAEEL	60S ribosomal protein L8 OS=Caenorhabditis elegans GN=rpl-8 PE=3 SV=1	28 kDa	0	0	0	0	0	1	1	0
RL9_CAEEL	60S ribosomal protein L9 OS=Caenorhabditis elegans GN=rpl-9 PE=3 SV=1	22 kDa	0	0	0	0	0	3	4	1
RLA0_CAEEL	60S acidic ribosomal protein P0 OS=Caenorhabditis elegans GN=rpa-0 PE=1 SV=3	34 kDa	0	0	0	0	0	4	7	1
RLA1_CAEEL	60S acidic ribosomal protein P1 OS=Caenorhabditis elegans GN=rla-1 PE=3 SV=2	11 kDa	0	0	0	0	0	1	0	1
RLA2_CAEEL	60S acidic ribosomal protein P2 OS=Caenorhabditis elegans GN=rpa-2 PE=3 SV=2	11 kDa	0	0	0	0	0	1	1	0
RS12_CAEEL	40S ribosomal protein S12 OS=Caenorhabditis elegans GN=rps-12 PE=3 SV=2	15 kDa	0	0	0	0	0	1	1	0
RS13_CAEEL	40S ribosomal protein S13 OS=Caenorhabditis elegans GN=rps-13 PE=3 SV=2	17 kDa	0	0	0	0	0	0	1	0
RS15_CAEEL	40S ribosomal protein S15 OS=Caenorhabditis elegans GN=rps-15 PE=1 SV=3	17 kDa	0	0	0	0	0	1	1	0
RS16_CAEEL	40S ribosomal protein S16 OS=Caenorhabditis elegans GN=rps-16 PE=1 SV=3	16 kDa	0	0	0	0	0	2	2	1
RS17_CAEEL	40S ribosomal protein S17 OS=Caenorhabditis elegans GN=rps-17 PE=3 SV=2	15 kDa	0	0	0	0	0	2	5	1
RS19_CAEEL	40S ribosomal protein S19 OS=Caenorhabditis elegans GN=rps-19 PE=2 SV=1	16 kDa	0	0	0	0	0	1	1	0
RS23_CAEEL	40S ribosomal protein S23 OS=Caenorhabditis elegans GN=rps-23 PE=3 SV=1	16 kDa	0	0	0	0	0	1	1	0
RS25_CAEEL	40S ribosomal protein S25 OS=Caenorhabditis elegans GN=rps-25 PE=3 SV=1	13 kDa	0	0	0	0	0	1	2	1
RS26_CAEEL	40S ribosomal protein S26 OS=Caenorhabditis elegans GN=rps-26 PE=3 SV=1	13 kDa	0	0	0	0	0	3	3	1
RS27A_CAEEL	Ubiquitin-like protein 1-40S ribosomal protein S27a OS=Caenorhabditis elegans GN=ubl-1 PE=1 SV=2	18 kDa	0	0	0	0	0	1	1	1
RS3_CAEEL	40S ribosomal protein S3 OS=Caenorhabditis elegans GN=rps-3 PE=3 SV=1	27 kDa	0	0	0	0	0	4	2	1
RS3A_CAEEL	40S ribosomal protein S3a OS=Caenorhabditis elegans GN=rps-1 PE=3 SV=2	29 kDa	0	0	0	0	0	1	2	0
RS5_CAEEL	40S ribosomal protein S5 OS=Caenorhabditis elegans GN=rps-5 PE=3 SV=1	23 kDa	0	0	0	0	0	1	2	0
RS6_CAEEL	40S ribosomal protein S6 OS=Caenorhabditis elegans GN=rps-6 PE=1 SV=1	28 kDa	0	0	0	0	0	1	1	0
RS7_CAEEL	40S ribosomal protein S7 OS=Caenorhabditis elegans GN=rps-7 PE=3 SV=1	22 kDa	0	0	0	0	0	2	2	1
RS8_CAEEL	40S ribosomal protein S8 OS=Caenorhabditis elegans GN=rps-8 PE=3 SV=1	24 kDa	0	0	0	0	0	4	6	1
RS9_CAEEL	40S ribosomal protein S9 OS=Caenorhabditis elegans GN=rps-9 PE=3 SV=1	22 kDa	0	0	0	0	0	0	2	0
RSSA_CAEEL	40S ribosomal protein SA OS=Caenorhabditis elegans GN=rps-0 PE=1 SV=3	31 kDa	0	0	0	0	0	3	1	1
SAR1_CAEEL	GTP-binding protein SAR1 OS=Caenorhabditis elegans GN=ZK180.4 PE=3 SV=1	22 kDa	0	0	0	0	0	1	1	0
SMD1_CAEEL	Probable small nuclear ribonucleoprotein Sm D1 OS=Caenorhabditis elegans GN=snr-3 PE=3 SV=1	14 kDa	0	0	0	0	0	0	0	2
SMD2_CAEEL	Probable small nuclear ribonucleoprotein Sm D2 OS=Caenorhabditis elegans GN=snr-4 PE=1 SV=1	13 kDa	0	0	0	0	0	0	0	1
sp|Q23381|MUTA_CAEEL-DECOY	Probable methylmalonyl-CoA mutase, mitochondrial OS=Caenorhabditis elegans GN=mmcm-1 PE=3 SV=2	?	0	0	0	0	2	0	0	0
sp|Q8I7I5|ROL3_CAEEL-DECOY	Protein roller-3 OS=Caenorhabditis elegans GN=rol-3 PE=1 SV=2	?	0	0	0	0	1	0	0	0
sp|Q9N593|CDC27_CAEEL-DECOY	Cell division cycle protein 27 homolog OS=Caenorhabditis elegans GN=mat-1 PE=1 SV=1	?	0	0	0	0	1	0	0	0
TCPA_CAEEL	T-complex protein 1 subunit alpha OS=Caenorhabditis elegans GN=cct-1 PE=3 SV=2	59 kDa	0	0	0	0	0	3	2	0
TCPB_CAEEL	T-complex protein 1 subunit beta OS=Caenorhabditis elegans GN=cct-2 PE=1 SV=2	57 kDa	0	0	0	0	0	2	2	0
TCPD_CAEEL	T-complex protein 1 subunit delta OS=Caenorhabditis elegans GN=cct-4 PE=2 SV=1	58 kDa	0	0	0	0	0	6	2	1
TCPG_CAEEL	T-complex protein 1 subunit gamma OS=Caenorhabditis elegans GN=cct-3 PE=3 SV=3	60 kDa	0	0	0	0	0	1	2	0
TCPQ_CAEEL	T-complex protein 1 subunit theta OS=Caenorhabditis elegans GN=cct-8 PE=1 SV=3	60 kDa	0	0	0	0	0	0	1	0
TCPZ_CAEEL	T-complex protein 1 subunit zeta OS=Caenorhabditis elegans GN=cct-6 PE=1 SV=1	59 kDa	0	0	0	0	0	1	0	0
TCTP_CAEEL	Translationally-controlled tumor protein homolog OS=Caenorhabditis elegans GN=tct-1 PE=1 SV=1	21 kDa	0	0	0	0	0	0	1	0
tr|B9WRU1|B9WRU1_CAEEL-DECOY	Uncharacterized protein OS=Caenorhabditis elegans GN=CELE_Y41E3.11 PE=1 SV=1	?	0	0	0	0	0	1	2	0
tr|G5EEE2|G5EEE2_CAEEL-DECOY	TAX2 OS=Caenorhabditis elegans GN=tax-2 PE=4 SV=1	?	0	0	0	0	1	0	0	0
tr|O01465|O01465_CAEEL-DECOY	GRounDhog (Hedgehog-like family) OS=Caenorhabditis elegans GN=grd-9 PE=4 SV=2	?	0	0	0	0	1	0	0	0
tr|O17002|O17002_CAEEL-DECOY	DNaJ domain (Prokaryotic heat shock protein) OS=Caenorhabditis elegans GN=dnj-22 PE=1 SV=1	?	0	0	0	0	1	0	0	0
tr|O45473|O45473_CAEEL-DECOY	Serpentine Receptor, class H OS=Caenorhabditis elegans GN=srh-186 PE=4 SV=1	?	0	0	0	0	1	0	0	0
tr|Q18566|Q18566_CAEEL-DECOY	DNA-directed RNA polymerase subunit OS=Caenorhabditis elegans GN=rpc-1 PE=1 SV=2	?	0	0	0	0	8	0	0	0
tr|Q20742|Q20742_CAEEL-DECOY	Uncharacterized protein OS=Caenorhabditis elegans GN=CELE_F54B11.7 PE=4 SV=1	?	0	0	0	0	3	0	0	0
tr|Q21085|Q21085_CAEEL-DECOY	C-type LECtin OS=Caenorhabditis elegans GN=clec-142 PE=4 SV=1	?	0	0	0	0	6	0	0	0
tr|Q22117|Q22117_CAEEL-DECOY	Uncharacterized protein OS=Caenorhabditis elegans GN=CELE_T03F7.5 PE=4 SV=2	?	0	0	0	0	1	0	0	0
tr|Q22522|Q22522_CAEEL-DECOY	Uncharacterized protein OS=Caenorhabditis elegans GN=CELE_T16A9.3 PE=4 SV=3	?	0	0	0	0	1	0	0	0
tr|Q23641|Q23641_CAEEL-DECOY	Uncharacterized protein OS=Caenorhabditis elegans GN=CELE_ZK856.6 PE=4 SV=1	?	0	0	0	0	5	0	0	0
tr|Q4TTC6|Q4TTC6_CAEEL-DECOY	Uncharacterized protein OS=Caenorhabditis elegans GN=CELE_ZK418.10 PE=3 SV=1	?	0	0	0	0	1	0	0	0
tr|Q94046|Q94046_CAEEL-DECOY (+1)	PIS (Pax-2, IA-1/6, Smad-2 interacting protein) homolog OS=Caenorhabditis elegans GN=pis-1 PE=1 SV=1	?	0	0	0	0	0	0	1	0
tr|Q9TXN8|Q9TXN8_CAEEL-DECOY	DM (Doublesex/MAB-3) Domain family OS=Caenorhabditis elegans GN=dmd-8 PE=4 SV=2	?	0	0	0	0	1	0	0	0
tr|Q9TXW4|Q9TXW4_CAEEL-DECOY	SKN-1 Dependent Zygotic transcript OS=Caenorhabditis elegans GN=sdz-34 PE=4 SV=1	?	0	0	0	0	1	0	0	0
UNC87_CAEEL	Protein unc-87 OS=Caenorhabditis elegans GN=unc-87 PE=1 SV=3	63 kDa	0	0	0	0	0	1	0	0
VATA_CAEEL	V-type proton ATPase catalytic subunit A OS=Caenorhabditis elegans GN=vha-13 PE=1 SV=3	66 kDa	0	0	0	0	0	1	3	0
VIT3_CAEEL	Vitellogenin-3 OS=Caenorhabditis elegans GN=vit-3 PE=1 SV=1	187 kDa	0	0	0	0	0	20	36	8
VIT5_CAEEL [3]	Cluster of Vitellogenin-5 OS=Caenorhabditis elegans GN=vit-5 PE=2 SV=2 (VIT5_CAEEL)	186 kDa	0	0	0	0	0	26	42	10
WAGO1_CAEEL [2]	Cluster of Argonaute protein wago-1 OS=Caenorhabditis elegans GN=wago-1 PE=1 SV=1 (WAGO1_CAEEL)	105 kDa	0	0	0	0	0	0	0	14
YKA3_CAEEL	Uncharacterized protein B0303.3 OS=Caenorhabditis elegans GN=B0303.3 PE=3 SV=1	48 kDa	0	0	0	0	0	2	1	0
